# Supplementary material for: Infracciones patrimoniales en los procesos de transferencia de datos
Source: MDPI journal article supplement (doi:10.3390/jof9020154), 2002-01-01
Supplement: s1 [file s1]

Supplementary Material for Journal of Fungi

## Comparative Roles of Rad4A and Rad4B in Photoprotection of *Beauveria bassiana* from Solar Ultraviolet Damage

Lei Yu, Si-Yuan Xu, Xin-cheng Luo, Sheng-Hua Ying, Ming-Guang Feng \*

Institute of Microbiology, College of Life Sciences, Zhejiang University, Hangzhou 310058, China

\* Correspondence: mgfeng@zju.edu.cn; Tel/Fax: (+)86-571-8820-6178

**Table S1.** Paired primers used for manipulation and detection of *rad4A* and *rad4B* in *B. bassiana* and Y2H assays for protein-protein interactions.

| Primers      | Paired sequences (5'–3')*                                                                                            | Purpose                                                          |
|--------------|----------------------------------------------------------------------------------------------------------------------|------------------------------------------------------------------|
| cRad4A-F/R   | <u>CAATCACAAACACCTTCAAAATGGTCGGAAGAAAGCGGCG</u> / <u>TCCTCGCCCTTGCTCAC</u><br><u>CATATCTACAAGAAATCCACCAC</u>         | Cloning <i>rad4A</i> cDNA (2517 bp) for fusion to <i>gfp</i>     |
| cRad4B-F/R   | <u>CAATCACAAACACCTTCAAAATGCCACCACATGTACCGCG</u> / <u>TCCTCGCCCTTGCTCAC</u><br><u>CATTGTCTCATCTCCAAGACCA</u>          | Cloning <i>rad4B</i> cDNA (2721 bp) for fusion to <i>gfp</i>     |
| cRad23-F/R   | <u>CAATCACAAACACCTTCAAAATGAAGGTCACCTTCAGAGA</u> / <u>TCCTCGCCCTTGCTCAC</u><br><u>CATTGGCTCGCAGGCGGCTGCT</u>          | Cloning <i>rad23</i> cDNA (1191 bp) for fusion to <i>mCherry</i> |
| adRad4A -F/R | <u>GCCATGGAGGCCAGTGAATT</u> CATGGTCGGAAGAAAGCGGCG / <u>CAGCTCGAGCTCGA</u><br><u>TGGATCCATCTACAAGAAATCCACCAC</u>      | Cloning <i>rad4A</i> cDNA (2517 bp) for ligation to AD           |
| bdRad4A -F/R | <u>ATGGCCATGGAGGCCGAATT</u> CATGGTCGGAAGAAAGCGGCG / <u>CGCTGCAGGTCGAC</u><br><u>GGATCCATCTACAAGAAATCCACCAC</u>       | Cloning <i>rad4A</i> cDNA (2517 bp) for ligation to BD           |
| adRad4B -F/R | <u>GCCATGGAGGCCAGTGAATT</u> CATGCCACCACATGTACCGCG / <u>CAGCTCGAGCTCGAT</u><br><u>GGATCCTGTCTCATCTCCAAGACCA</u>       | Cloning <i>rad4B</i> cDNA (2721 bp) for ligation to AD           |
| bdRad4B -F/R | <u>ATGGCCATGGAGGCCGAATT</u> CATGCCACCACATGTACCGCG / <u>CGCTGCAGGTCGAC</u><br><u>GGATCCTGTCTCATCTCCAAGACCA</u>        | Cloning <i>rad4B</i> cDNA (2721 bp) for ligation to BD           |
| adRad23 -F/R | <u>GCCATGGAGGCCAGTGAATT</u> CATGAAGGTCACCTTCAGAGA / <u>CAGCTCGAGCTCGA</u><br><u>TGGATCCTTGGCTCGCAGGCGGCTGCT</u>      | Cloning <i>rad23</i> cDNA (1191 bp) for ligation to AD           |
| bdRad23 -F/R | <u>ATGGCCATGGAGGCCGAATT</u> CATGAAGGTCACCTTCAGAGA / <u>CGCTGCAGGTCGAC</u><br><u>GGATCCTTGGCTCGCAGGCGGCTGCT</u>       | Cloning <i>rad23</i> cDNA (1191 bp) for ligation to BD           |
| adWC1-F/R    | <u>GCCATGGAGGCCAGTGAATT</u> CATGGAAGGATACTACCCTCC / <u>CAGCTCGAGCTCGAT</u><br><u>GGATCCAGGTAAGCTCGTTTACGCT</u>       | Cloning <i>wc1</i> cDNA (2889 bp) for ligation to AD             |
| adWC2-F/R    | <u>GCCATGGAGGCCAGTGAATT</u> CATGCCAGGACACGCGCC / <u>CAGCTCGAGCTCGAT</u><br><u>GGATCCGCTTCCGGCACCAACTCTG</u>          | Cloning <i>wc2</i> cDNA (1497 bp) for ligation to AD             |
| adPhr1-F/R   | <u>GCCATGGAGGCCAGTGAATT</u> CATGGCGCTCGTGCAACGAA / <u>CAGCTCGAGCTCGAT</u><br><u>GGATCC</u> CGCCACAGCCGCTTGACG        | Cloning <i>phr1</i> cDNA (1761 bp) for ligation to AD            |
| bdPhr1-F/R   | <u>ATGGCCATGGAGGCCGAATT</u> CATGGCGCTCGTGCAACGAA / <u>CGCTGCAGGTCGAC</u><br><u>GGATCCC</u> CGCCACAGCCGCTTGACG        | Cloning <i>phr1</i> cDNA (1761 bp) for ligation to BD            |
| adPhr2-F/R   | <u>GCCATGGAGGCCAGTGAATT</u> CATGACAAAGCCAGAGTCAT / <u>CAGCTCGAGCTCGAT</u><br><u>GGATCCCGTTTTCTGCTTCTTCGCTG</u>       | Cloning <i>phr2</i> cDNA (1869 bp) for ligation to AD            |
| bdPhr2-F/R   | <u>ATGGCCATGGAGGCCGAATT</u> CATGACAAAGCCAGAGTCAT / <u>CGCTGCAGGTCGAC</u><br><u>GGATCCCGTTTTCTGCTTCTTCGCTG</u>        | Cloning <i>phr2</i> cDNA (1869 bp) for ligation to BD            |
| upRad4A -F/R | <u>ACGAGCTGTACAAGTAACCCGGG</u> GACCCAGTCTGCTCCAT / <u>TGGCTGCAGGTCGAC</u><br><u>GGATCCC</u> CGCCAAAGTGCGTCATAG       | Cloning <i>rad4A</i> 5'-end (1787 bp) for disruption             |
| dnRad4A -F/R | <u>GACCCATGGCTCGAGTCTAG</u> ACTCAAGGGCATCGTGGTC / <u>GGTGGTGGTGGCTAGC</u><br><u>GTTAAC</u> GAGGCAACGGAGGGGAC         | Cloning <i>rad4A</i> 3'-end (1844 bp) for disruption             |
| upRad4B -F/R | <u>ACGAGCTGTACAAGTAACCCGGG</u> ATCTCATCGAGGTCTAGCA / <u>TGGCTGCAGGTCGA</u><br><u>CGGATCCT</u> GTAATCGCCTGTTACG       | Cloning <i>rad4B</i> 5'-end (1871 bp) for disruption             |
| dnRad4B -F/R | <u>GACCCATGGCTCGAGTCTAG</u> AGAGCCTACCACTAACCACAGC / <u>GGTGGTGGTGGCTA</u><br><u>GCGTTAAC</u> ATGGAGCCGAGACCGATT     | Cloning <i>rad4B</i> 3'-end (1778 bp) for gene disruption        |
| flRad4A -F/R | <u>ATCCGTCGACCTGCAGCCAAGCTT</u> ACTGATAATCCGTGACTGGTG / <u>ACACTAGTCAGAT</u><br><u>CTTCTCTAG</u> ACGGTTCCCGAATAGAGCA | Cloning full-length <i>rad4A</i> (6107 bp) for complementation   |
| flRad4B -F/R | <u>ATCCGTCGACCTGCAGCCAAGCTT</u> GGGGAAGTGCCAAGAAGG / <u>ACACTAGTCAGAT</u><br><u>CTTCTCTAG</u> AATGGAGCCGAGACCGATT    | Cloning full-length <i>rad4B</i> (6100 bp) for complementation   |
| pRad4A -F/R  | GCTTTCCTTTCTGTTGTCAG / CCTGCTCTGTTCCACATTCT                                                                          | PCR detecting <i>rad4A</i>                                       |
| pRad4B -F/R  | TTATTTACCCCATCTGACTGCT / TTCGGCAACTACGACACCT                                                                         | PCR detecting <i>rad4B</i>                                       |

\* The underlined regions are DNA fragments to exchange for the corresponding fragments of constructed vectors at the sites (double-underlined) of restriction enzymes (*EcoRI/BamHI* for ligation to AD or BD, *XmaI/BamHI* and *XbaI/HpaI* for deletion vectors of *rad4A* and *rad4B*, and *HindIII/XbaI* for complementation vectors of *rad4A* and *rad4B*).

**Table S2.** Paired primers used for transcriptional analysis of anti-UV genes in *B. bassiana*.

| Gene         | Tag locus* | Annotation             | Sequences (5'–3') of paired primers         |
|--------------|------------|------------------------|---------------------------------------------|
| <i>rad4A</i> | BBA_02814  | Rad4 homolog 1         | AGTCCGATATGCAAAGGCGT / TACTTCGTGGCGCCGTAAAT |
| <i>rad4B</i> | BBA_02963  | Rad4 homolog 2         | CCTGATGGTACAGCCAAGGA/CGTGTCTCTTCCACTTCGT    |
| <i>wc1</i>   | BBA_10271  | White collar 1         | GACCATGCAATTCAACAACG / GTATCGCTTGATCGACAGCA |
| <i>wc2</i>   | BBA_01403  | White collar 2         | CCAGTCTCCTTTCTGCCAAG / TGGCAGATGAACCAGTCAAG |
| <i>phr1</i>  | BBA_01664  | CPD photolyase         | ACTCATAGACTGGCGCATGG / TTTTCGCCTTGTCTCCAGCA |
| <i>phr2</i>  | BBA_01034  | 6-4 PP photolyase      | CACAGGCAAGACGTACCCC / CGTCGTCACTCTCCAGAACA  |
| <i>cryD</i>  | BBA_02424  | DASH-type cryptochrome | CGTATTACCTCCCGACCAGA/GCACTGCAGATGCTGGATAA   |
| <i>rad23</i> | BBA_01030  | Rad23 ortholog         | AGCAGAAATTCACCCTCGAA / CAGACAACGAAGCCCTTTTC |
| <i>act</i>   | BBA_04860  | $\beta$ -actin         | GGCAACATTGTCATGTCTGG / TTTGCTGGAAGGTGGATAGG |

\* Gene accession codes in *B. bassiana* genome under the NCBI accession NL\_ADAH000000000.

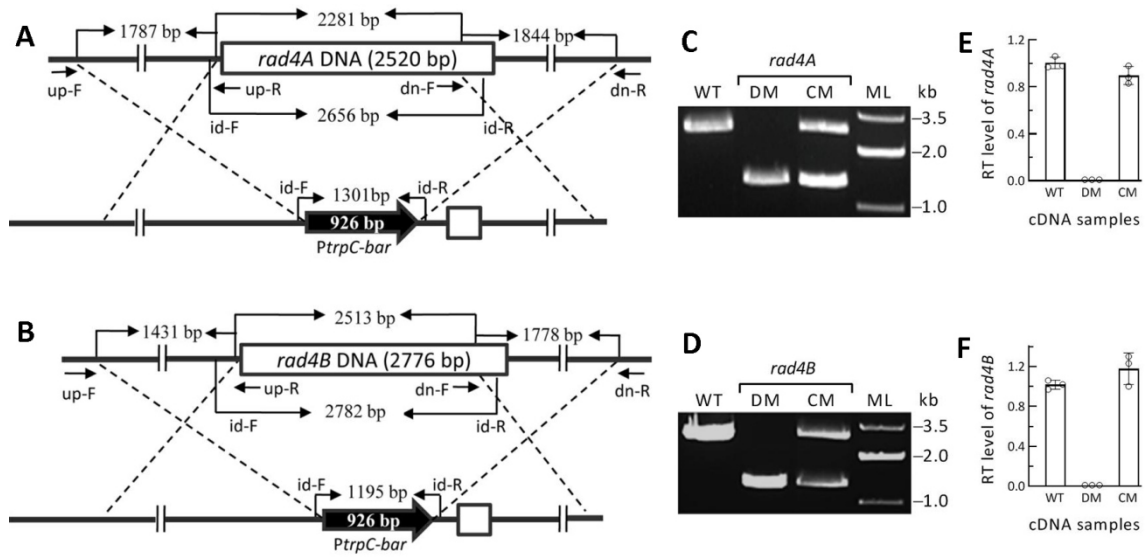

**Figure S1.** Generation and identification of *rad4A* and *rad4B* mutants in *B. bassiana*. (**A, B**) Schematic diagrams for targeted single-gene deletion strategies. (**C, D**) The *rad1*, *rad10*, *wc1* and *wc2* mutants identified via PCR analysis with paired primers (see Table S1), respectively. The detected DNA fragments indicate a success in deleting the partial or full-length coding and partial flanking regions of each target gene from the WT strain as expected and also in complementing it into the deletion mutant (2782 + 926 – 1301 = 2281 bp for *rad4A*, and 2782 + 926 – 1195 = 2513 bp for *rad4B*). DM, deletion mutant. CM, complementation mutant. ML, molecular ladder of genomic DNA. (**E, F**) Relative transcript (RT) levels of *rad4A* and *rad4B* in the 3 d-old SDAY cultures of their DM and CM strains with respect to the WT standard. Note that the expression of each target gene was not detectable in its DM but well restored in its CM. Error bars: standard deviations of the means from three cDNA samples derived from independent cultures of each strain.

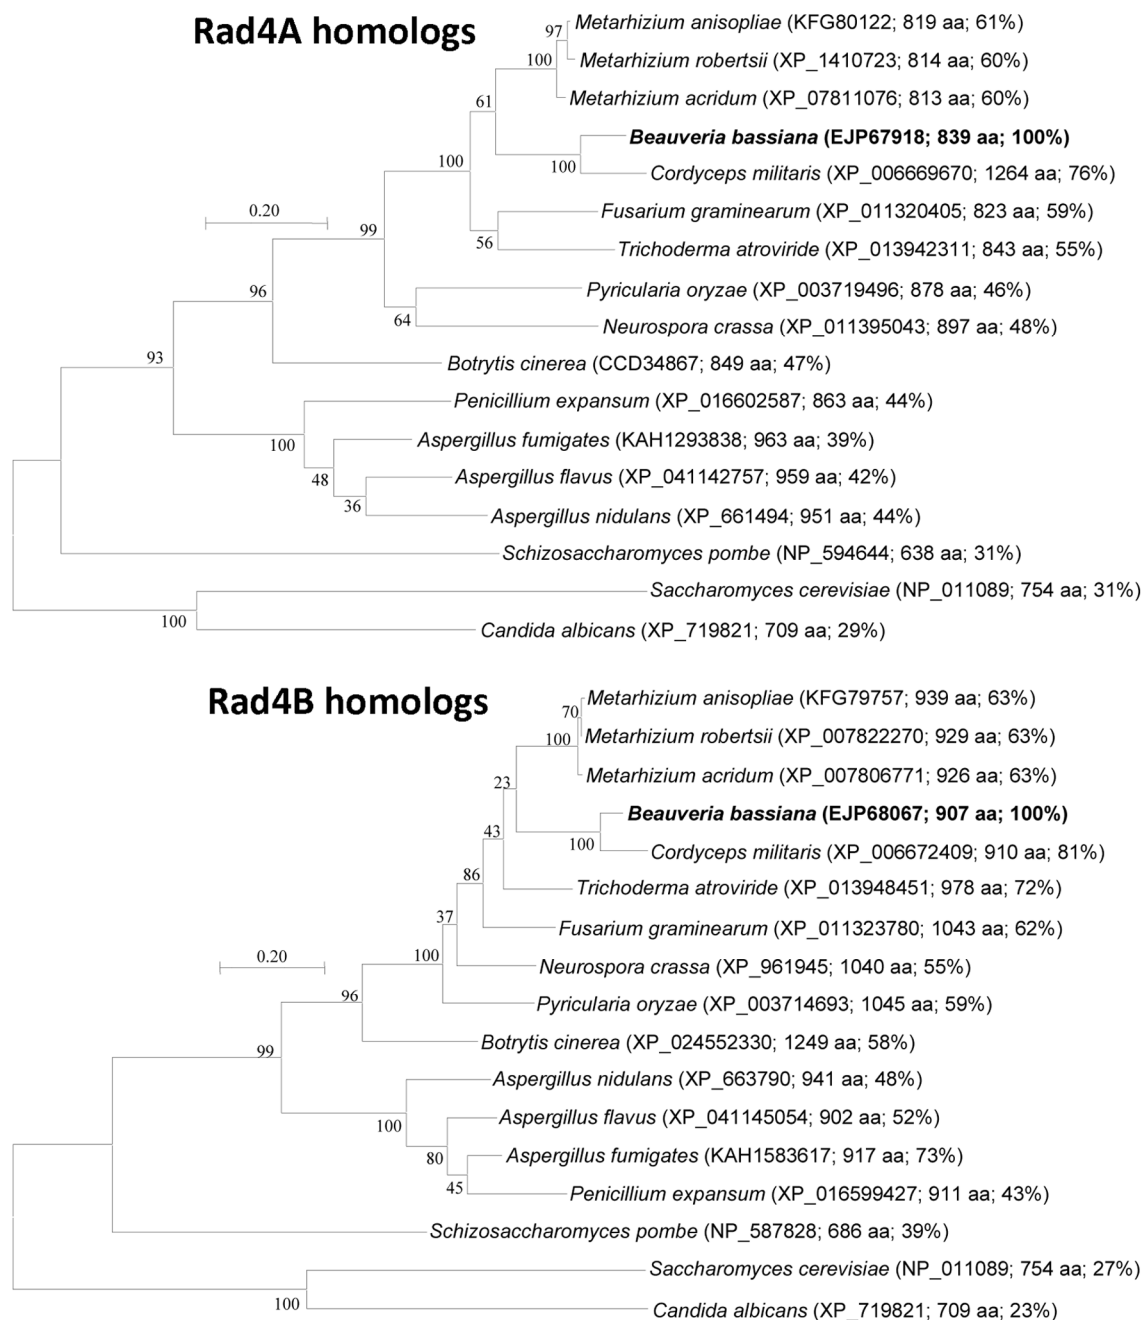

**Figure S2.** Phylogenetic trees of Rad4A and Rad4B homologs found in representative ascomycetes. Each tree was constructed with the maximum likelihood method in MEGA11 (<http://www.megasoftware.net/>). Bootstrap values of 1000 replications are shown at nodes. Scale bar: branch length proportional to genetic distance. The NCBI accession code of each protein and its protein sequence identity to its *B. bassiana* homolog (in bold) are given in the parentheses following the name of its host fungus. Note that Rad4A and Rad4B paralogs exist in all surveyed fungal genomes except *S. cerevisiae* and *C. albicans*.

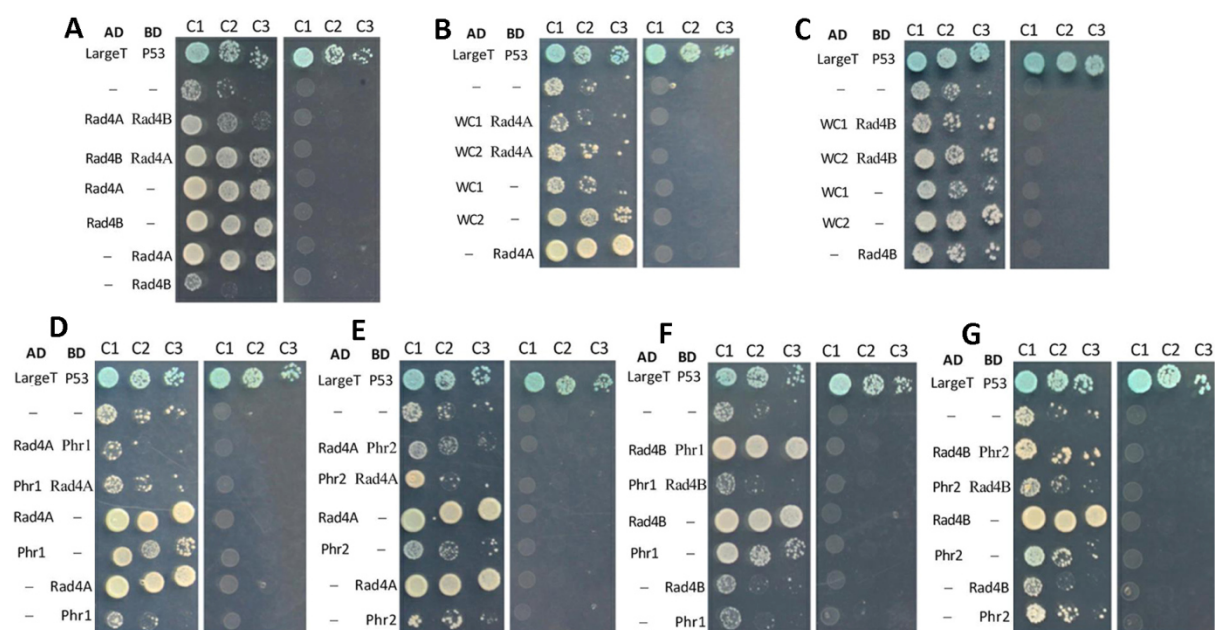

**Figure S3.** Y2H assays for protein-protein interactions in *B. bassiana*. Note no signals for interactions between Rad4A and Rad4B (A), between Rad4A and WC1 or WC2 (B), between Rad104B and WC1 or WC2 (C), between Rad4A and Phr1 (D) or Phr2 (E), and between Rad4B and Phr1 (F) or Phr2 (G).

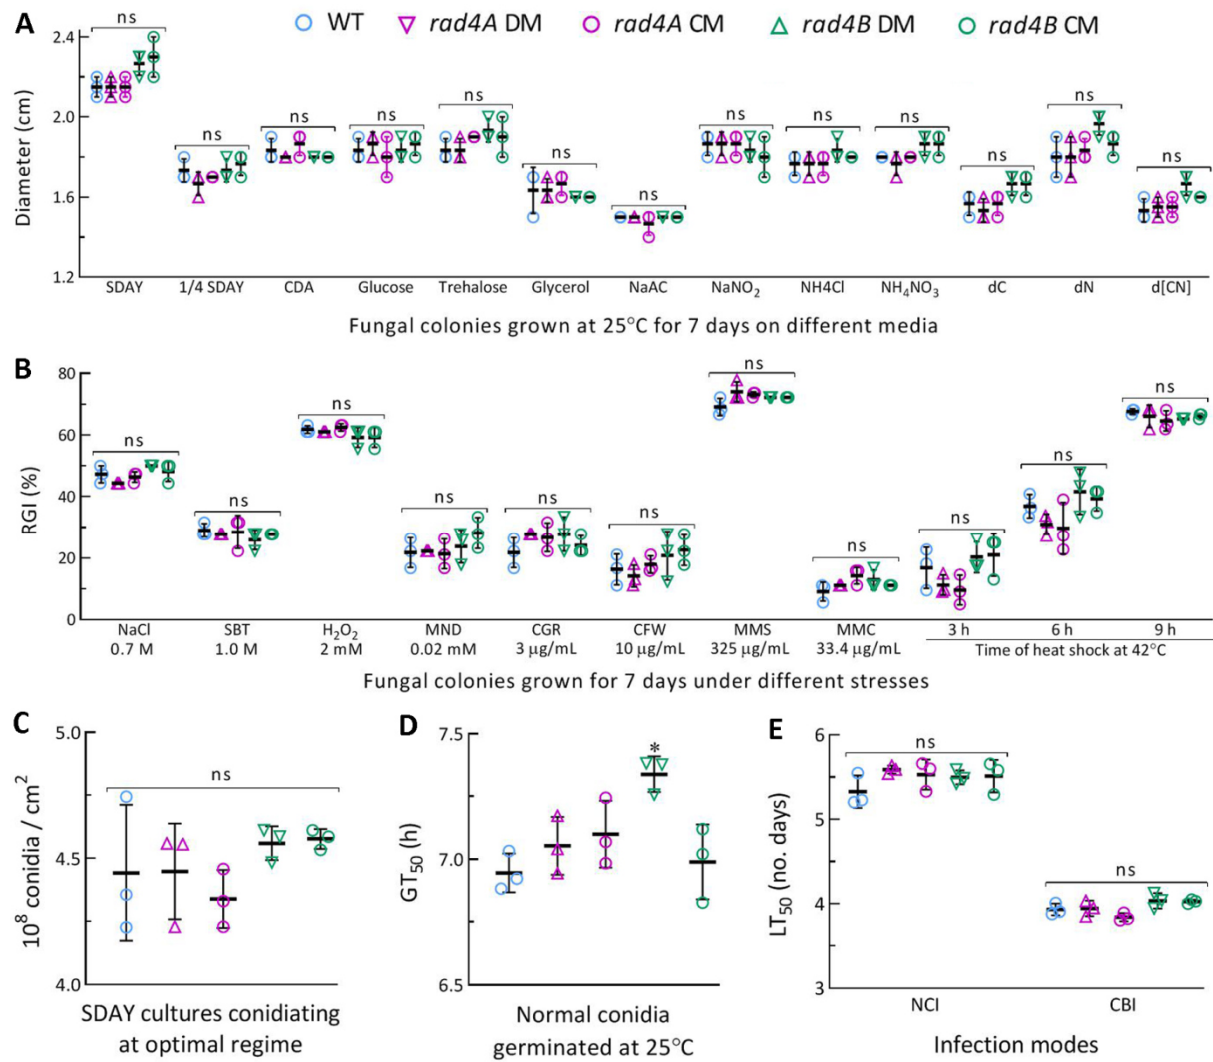

**Figure S4.** Rad4A and Rad4B are dispensable for the lifecycle in vitro and in vivo of *B. bassiana*. (A) Diameters of fungal colonies (DM, deletion mutant; CM, complementation mutant) incubated at 25°C for 7 days on the plates of rich medium SDAY, 1/4 SDAY, minimal medium CDA and CDAs amended with different carbon or nitrogen sources and with the deletion of carbon (d[C]) or nitrogen (d[N]) source or both (d[CN]). (B) Relative growth inhibition (RGI) percentages of fungal colonies incubated at 25°C for 7 days on CDA plates supplemented with indicated concentrations of different chemical stressors (SBT, sorbitol; MND, menadione; CGR, Congo red; CFW, calcofluor white; MMS, methyl methanesulfonate; and MMC, mitomycin C) or for 5-day growth recovery after exposing 2-day-old SDAY colonies to a heat shock for 3, 6 and 9 h at 42°C. All fungal colonies were initiated by spotting 1 µL aliquots of a 10<sup>6</sup> conidia/mL suspension. (C) Conidial yields measured from the 7-day-old SDAY cultures initiated by spreading 100 µL aliquots of a 10<sup>7</sup> conidia/mL suspension at the optimal regime of 25°C and L:D 12:12. (D) Median germination time (GT<sub>50</sub>) of conidia at 25°C. (E) Median lethal time (LT<sub>50</sub>) estimates for fungal strains against *Galleria mellonella* larvae (4<sup>th</sup> instar) inoculated by topical application (immersion) of a 10<sup>7</sup> conidia/mL for normal cuticle infection (NCI) or intrahemocoel injection ~500 conidia per larva for cuticle-bypassing infection (CBI).  $P < 0.05^*$  or  $> 0.05$  (ns, not significant) in Tukey's tests. Error bars: standard deviations of the means from three independent replicates.
